# Supplementary material for: Genome-Wide Association Study of Serum Minerals Levels in Children of Different Ethnic Background
Source: PubMed Central journal article supplement (PMC4401557; doi:10.1371/journal.pone.0123499), 2015-04-17

Distribution of serum Ca level (European American)

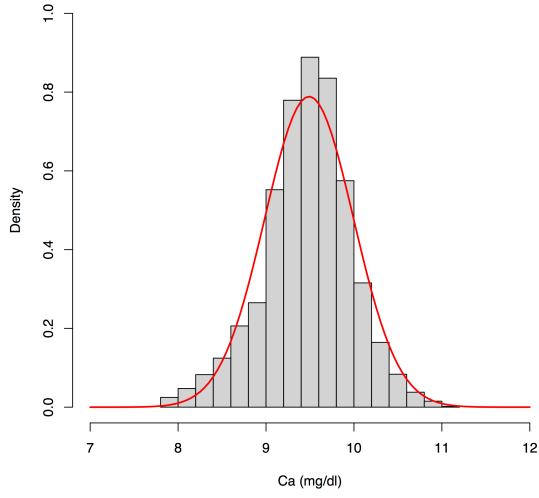

Distribution of serum Ca level (African American)

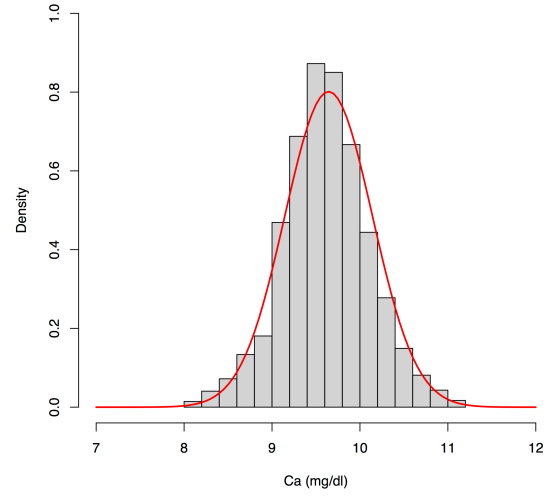

Distribution of serum Mg level (European American)

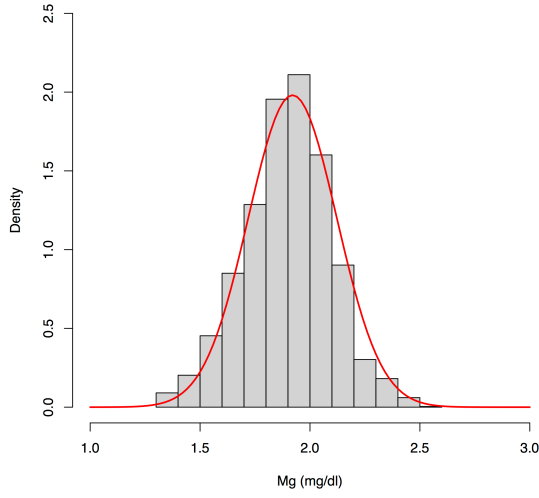

Distribution of serum Mg level (African American)

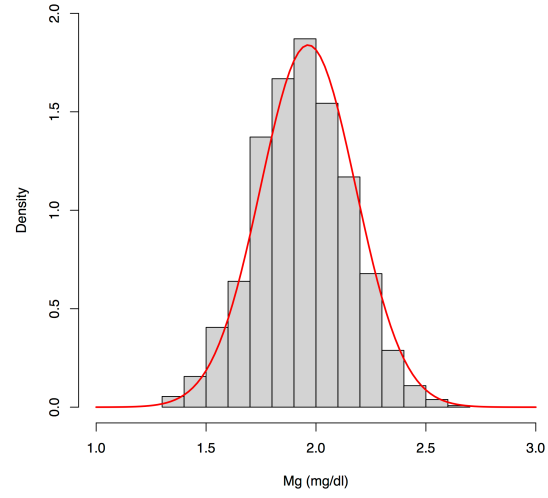

Supplement: pone.0123499.s003.pdf [file pone.0123499.s003.pdf]
